# Supplementary material for: The CD36 Ligand-Promoted Autophagy Protects Retinal Pigment Epithelial Cells from Oxidative Stress
Source: Oxid Med Cell Longev. 2021 Mar 28;2021:6691402. doi: 10.1155/2021/6691402 (PMC8019622; doi:10.1155/2021/6691402)
Supplement: Supplementary materials — contains Tables S1-S2 and Figures S1-S6. Table S1: primer sequences. Table S2: statistical comparisons and p values. Figure S1: MPE-001 pretreatment prevents the NaIO3-induced loss of mitochondrial membrane potential. Figure S2: MPE-001 improved the viability of differentiated ARPE-19 cells exposed to NaIO3. Figure S3: NAC protected hTERT RPE-1 cells against NaIO3-induced cytotoxicity in an autophagy-independent manner. Figure S4: bafilomycin A1 abolished the cytoprotective effect of MPE-001 on differentiated ARPE-19 cells. Figure S5: the effect of MPE-001 and/or NaIO3 treatments on LC3B and TOMM20 colocalization. Figure S6: the effect of mitochondria-selective antioxidant compounds on NaIO3-induced cytotoxicity. [file 6691402.f1.pdf]

**Table S1. Primer sequences**

| <b>Gene symbol</b> | <b>Gene name</b>                                                            | <b>Forward</b>           | <b>Reverse</b>           |
|--------------------|-----------------------------------------------------------------------------|--------------------------|--------------------------|
| <i>CAT</i>         | Catalase                                                                    | gctcattttgaccgagagaga    | tgacctcaaagtagccaaagg    |
| <i>CD36</i>        | Cluster of differentiation 36                                               | tggaacagaggctgacaactt    | ttgattttgatagatatgggatgc |
| <i>GAPDH</i>       | Glyceraldehyde-3-phosphate dehydrogenase                                    | gagccaaaagggtcatcatctc   | aggaggcattgctgatgatct    |
| <i>GCLM</i>        | Glutamate-cysteine ligase modifier subunit                                  | gacaaaacacagttggaacagc   | cagtcaaactctgggtggcatc   |
| <i>GPX1</i>        | Glutathione peroxidase 1                                                    | cgccaagaacgaagagattc     | gttcacctcgacttctctcg     |
| <i>HMOX1</i>       | Heme oxygenase 1                                                            | ggcagaggggtgatagaagagg   | agctcctgcaactcctcaaa     |
| <i>NFE2L2</i>      | Nuclear factor, erythroid 2 like 2                                          | acacgggtccacagctcatc     | tgccctcaaagtagtgcataca   |
| <i>NQO1</i>        | NAD(P)H quinone dehydrogenase 1                                             | cagctcaccgagagcctagt     | gagtgagccagtacgatcagtg   |
| <i>PPIA</i>        | Peptidylprolyl isomerase A                                                  | cctaaagcatacgggtcctg     | tttcactttgccaacacca      |
| <i>PRDX1</i>       | Peroxiredoxin 1                                                             | aggccttcagttcactgac      | tttgctcttttgacatcagg     |
| <i>PRDX3</i>       | Peroxiredoxin 3                                                             | agcaaaattattcagcaccagtt  | ccttaaaatagggtgcatgctg   |
| <i>PRDX5</i>       | Peroxiredoxin 5                                                             | tcctgggtgatccactg        | atgccatcctgtaccacat      |
| <i>SOD1</i>        | Superoxide dismutase 1                                                      | tcctatgttcagagtttgagat   | cccaccgtgttttctggata     |
| <i>SOD2</i>        | Superoxide dismutase 2                                                      | aatcaggatccactgcaagg     | taagcgtgctcccacacat      |
| <i>TXN2</i>        | Thioredoxin 2                                                               | gagacaccagtggttggtgga    | ttggccaccatcttctctaac    |
| <i>TXNRD1</i>      | Thioredoxin reductase 1                                                     | caattggaatccaccctgtc     | ccacactggggcttaacct      |
| <i>YWHAZ</i>       | Tyrosine 3-monooxygenase/tryptophan 5-monooxygenase activation protein zeta | gcaattactgagagacaactgaca | tggaaggccggttaatttt      |

**Table S2. Statistical comparisons and p-values**

|                  |                           | <b>Pair compared</b>                | <b>Adjusted p-value</b> |
|------------------|---------------------------|-------------------------------------|-------------------------|
| <b>Figure 1A</b> |                           |                                     |                         |
|                  | NaIO <sub>3</sub> 0 mM    | NaIO <sub>3</sub> 6.25 mM           | 0.0161                  |
|                  | NaIO <sub>3</sub> 0 mM    | NaIO <sub>3</sub> 12.5 mM           | 0.0004                  |
|                  | NaIO <sub>3</sub> 0 mM    | NaIO <sub>3</sub> 25 mM             | <0.0001                 |
| <b>Figure 1B</b> |                           |                                     |                         |
|                  | NaIO <sub>3</sub> 0 mM    | NaIO <sub>3</sub> 6.25 mM           | <0.0012                 |
|                  | NaIO <sub>3</sub> 0 mM    | NaIO <sub>3</sub> 12.5 mM           | <0.0001                 |
|                  | NaIO <sub>3</sub> 0 mM    | NaIO <sub>3</sub> 25 mM             | <0.0001                 |
| <b>Figure 1C</b> |                           |                                     |                         |
|                  | NaIO <sub>3</sub> 0 mM    | NaIO <sub>3</sub> 6.25 mM           | 0.8518                  |
|                  | NaIO <sub>3</sub> 0 mM    | NaIO <sub>3</sub> 12.5 mM           | 0.2394                  |
|                  | NaIO <sub>3</sub> 0 mM    | NaIO <sub>3</sub> 25 mM             | <0.0001                 |
| <b>Figure 2A</b> |                           |                                     |                         |
|                  | NaIO <sub>3</sub> 0 mM    | NaIO <sub>3</sub> 6.25 mM           | 0.0029                  |
|                  | NaIO <sub>3</sub> 0 mM    | NaIO <sub>3</sub> 12.5 mM           | <0.0001                 |
|                  | NaIO <sub>3</sub> 0 mM    | NaIO <sub>3</sub> 25 mM             | <0.0001                 |
|                  | NaIO <sub>3</sub> 0 mM    | MPE-001 + NaIO <sub>3</sub> 0 mM    | >0.9999                 |
|                  | NaIO <sub>3</sub> 6.25 mM | MPE-001 + NaIO <sub>3</sub> 6.25 mM | 0.0477                  |
|                  | NaIO <sub>3</sub> 12.5 mM | MPE-001 + NaIO <sub>3</sub> 12.5 mM | 0.0042                  |
|                  | NaIO <sub>3</sub> 25 mM   | MPE-001 + NaIO <sub>3</sub> 25 mM   | 0.9723                  |
| <b>Figure 2B</b> |                           |                                     |                         |
|                  | Vehicle                   | NaIO <sub>3</sub>                   | 0.0011                  |
|                  | NaIO <sub>3</sub>         | MPE-001 + NaIO <sub>3</sub>         | 0.0188                  |
| <b>Figure 2C</b> |                           |                                     |                         |
|                  | Vehicle                   | NaIO <sub>3</sub>                   | 0.0037                  |
|                  | NaIO <sub>3</sub>         | MPE-001 + NaIO <sub>3</sub>         | 0.0261                  |
| <b>Figure 2F</b> |                           |                                     |                         |
|                  | Vehicle                   | NaIO <sub>3</sub>                   | 0.0002                  |
|                  | NaIO <sub>3</sub>         | MPE-001 + NaIO <sub>3</sub>         | 0.0075                  |
| <b>Figure 2H</b> |                           |                                     |                         |
| siCON            | Vehicle                   | NaIO <sub>3</sub>                   | <0.0001                 |
|                  | NaIO <sub>3</sub>         | MPE-001 + NaIO <sub>3</sub>         | 0.0304                  |
| siCD36           | Vehicle                   | NaIO <sub>3</sub>                   | <0.0001                 |
|                  | NaIO <sub>3</sub>         | MPE-001 + NaIO <sub>3</sub>         | 0.9951                  |
| <b>Figure 3A</b> |                           |                                     |                         |
| $H_{2}O_{2}$     | Vehicle                   | MPE-001                             | >0.9999                 |
|                  | Vehicle                   | NaIO <sub>3</sub>                   | 0.0003                  |

|                          |                   |                            |         |
|--------------------------|-------------------|----------------------------|---------|
|                          | NaIO <sub>3</sub> | MPE-001+ NaIO <sub>3</sub> | 0.9999  |
| <b>Figure 3A</b>         |                   |                            |         |
| <i>NQO1</i>              | Vehicle           | MPE-001                    | 0.9596  |
|                          | Vehicle           | NaIO <sub>3</sub>          | 0.0005  |
|                          | NaIO <sub>3</sub> | MPE-001+ NaIO <sub>3</sub> | 0.9266  |
| <b>Figure 3A</b>         |                   |                            |         |
| <i>GCLM</i>              | Vehicle           | MPE-001                    | 0.9442  |
|                          | Vehicle           | NaIO <sub>3</sub>          | 0.0009  |
|                          | NaIO <sub>3</sub> | MPE-001+ NaIO <sub>3</sub> | 0.9442  |
| <b>Figure 3A</b>         |                   |                            |         |
| <i>PRDX<sub>1</sub></i>  | Vehicle           | MPE-001                    | 0.8235  |
|                          | Vehicle           | NaIO <sub>3</sub>          | 0.0002  |
|                          | NaIO <sub>3</sub> | MPE-001+ NaIO <sub>3</sub> | 0.9607  |
| <b>Figure 3A</b>         |                   |                            |         |
| <i>TXNR<sub>DI</sub></i> | Vehicle           | MPE-001                    | 0.9987  |
|                          | Vehicle           | NaIO <sub>3</sub>          | <0.0001 |
|                          | NaIO <sub>3</sub> | MPE-001+ NaIO <sub>3</sub> | 0.9293  |
| <b>Figure 3A</b>         |                   |                            |         |
| <i>CAT</i>               | Vehicle           | MPE-001                    | 0.2255  |
|                          | Vehicle           | NaIO <sub>3</sub>          | 0.2255  |
|                          | NaIO <sub>3</sub> | MPE-001+ NaIO <sub>3</sub> | 0.2255  |
| <b>Figure 3A</b>         |                   |                            |         |
| <i>GPX1</i>              | Vehicle           | MPE-001                    | 0.9100  |
|                          | Vehicle           | NaIO <sub>3</sub>          | 0.9100  |
|                          | NaIO <sub>3</sub> | MPE-001+ NaIO <sub>3</sub> | 0.6008  |
| <b>Figure 3A</b>         |                   |                            |         |
| <i>SOD1</i>              | Vehicle           | MPE-001                    | 0.6876  |
|                          | Vehicle           | NaIO <sub>3</sub>          | 0.8048  |
|                          | NaIO <sub>3</sub> | MPE-001+ NaIO <sub>3</sub> | 0.6601  |
| <b>Figure 3A</b>         |                   |                            |         |
| <i>SOD2</i>              | Vehicle           | MPE-001                    | 0.6639  |
|                          | Vehicle           | NaIO <sub>3</sub>          | 0.7285  |
|                          | NaIO <sub>3</sub> | MPE-001+ NaIO <sub>3</sub> | 0.9463  |
| <b>Figure 3A</b>         |                   |                            |         |
| <i>PRDX<sub>3</sub></i>  | Vehicle           | MPE-001                    | 0.5645  |
|                          | Vehicle           | NaIO <sub>3</sub>          | 0.1908  |
|                          | NaIO <sub>3</sub> | MPE-001+ NaIO <sub>3</sub> | 0.5645  |
| <b>Figure 3A</b>         |                   |                            |         |
| <i>PRDX<sub>5</sub></i>  | Vehicle           | MPE-001                    | 0.8548  |
|                          | Vehicle           | NaIO <sub>3</sub>          | 0.8548  |
|                          | NaIO <sub>3</sub> | MPE-001+ NaIO <sub>3</sub> | 0.8548  |

|                               |                   |                            |         |
|-------------------------------|-------------------|----------------------------|---------|
| <b>Figure 3A</b>              |                   |                            |         |
| TXN2                          | Vehicle           | MPE-001                    | 0.1318  |
|                               | Vehicle           | NaIO <sub>3</sub>          | 0.5323  |
|                               | NaIO <sub>3</sub> | MPE-001+ NaIO <sub>3</sub> | 0.1148  |
| <b>Figure 3B</b>              |                   |                            |         |
|                               | Vehicle           | MPE-001                    | 0.8258  |
|                               | Vehicle           | NaIO <sub>3</sub>          | 0.0301  |
|                               | NaIO <sub>3</sub> | MPE-001+ NaIO <sub>3</sub> | 0.9812  |
| <b>Figure 3C</b>              |                   |                            |         |
| 2h                            | Vehicle           | NaIO <sub>3</sub>          | >0.9999 |
|                               | NaIO <sub>3</sub> | MPE-001+ NaIO <sub>3</sub> | >0.9999 |
| <b>Figure 3C</b>              |                   |                            |         |
| 4h                            | Vehicle           | NaIO <sub>3</sub>          | 0.9985  |
|                               | NaIO <sub>3</sub> | MPE-001+ NaIO <sub>3</sub> | >0.9999 |
| <b>Figure 3C</b>              |                   |                            |         |
| 16h                           | Vehicle           | NaIO <sub>3</sub>          | 0.0125  |
|                               | NaIO <sub>3</sub> | MPE-001+ NaIO <sub>3</sub> | >0.9999 |
| <b>Figure 4A LC3-II/I</b>     |                   |                            |         |
|                               | Vehicle           | MPE-001                    | 0.9962  |
|                               | Vehicle           | NaIO <sub>3</sub>          | 0.0159  |
|                               | Vehicle           | MPE-001+ NaIO <sub>3</sub> | 0.0010  |
|                               | NaIO <sub>3</sub> | MPE-001+ NaIO <sub>3</sub> | 0.6748  |
| <b>Figure 4A LC3-II/I</b>     |                   |                            |         |
| +Bafilomycin A1               | Vehicle           | MPE-001                    | 0.9907  |
|                               | Vehicle           | NaIO <sub>3</sub>          | 0.5643  |
|                               | Vehicle           | MPE-001+ NaIO <sub>3</sub> | 0.0005  |
|                               | NaIO <sub>3</sub> | MPE-001+ NaIO <sub>3</sub> | 0.0189  |
| <b>Figure 4A LC3-II/GAPDH</b> |                   |                            |         |
|                               | Vehicle           | MPE-001                    | 0.96    |
|                               | Vehicle           | NaIO <sub>3</sub>          | 0.3555  |
|                               | Vehicle           | MPE-001+ NaIO <sub>3</sub> | 0.1759  |
|                               | NaIO <sub>3</sub> | MPE-001+ NaIO <sub>3</sub> | 0.9902  |
| <b>Figure 4A LC3-II/GAPDH</b> |                   |                            |         |
| +Bafilomycin A1               | Vehicle           | MPE-001                    | 0.9996  |
|                               | Vehicle           | NaIO <sub>3</sub>          | 0.9727  |
|                               | Vehicle           | MPE-001+ NaIO <sub>3</sub> | 0.0123  |
|                               | NaIO <sub>3</sub> | MPE-001+ NaIO <sub>3</sub> | 0.0414  |
| <b>Figure 4C</b>              |                   |                            |         |
|                               | Vehicle           | MPE-001                    | 0.9726  |
|                               | Vehicle           | NaIO <sub>3</sub>          | 0.0024  |
|                               | Vehicle           | MPE-001+ NaIO <sub>3</sub> | 0.0722  |

|                                    |                                              |         |
|------------------------------------|----------------------------------------------|---------|
| NaIO <sub>3</sub>                  | MPE-001+ NaIO <sub>3</sub>                   | <0.0001 |
| <b>Figure 4D Left</b>              |                                              |         |
| Vehicle                            | Wortmannin                                   | >0.9999 |
| Vehicle                            | NaIO <sub>3</sub>                            | <0.0001 |
| NaIO <sub>3</sub>                  | MPE-001 + NaIO <sub>3</sub>                  | 0.0259  |
| Wortmannin                         | NaIO <sub>3</sub> + Wortmannin               | <0.0001 |
| NaIO <sub>3</sub> + Wortmannin     | MPE-001 + NaIO <sub>3</sub> + Wortmannin     | >0.9999 |
| <b>Figure 4D Right</b>             |                                              |         |
| Vehicle                            | Bafilomycin A1                               | 0.9997  |
| Vehicle                            | NaIO <sub>3</sub>                            | <0.0001 |
| NaIO <sub>3</sub>                  | MPE-001 + NaIO <sub>3</sub>                  | 0.0004  |
| Bafilomycin A1                     | NaIO <sub>3</sub> + Bafilomycin A1           | <0.0001 |
| NaIO <sub>3</sub> + Bafilomycin A1 | MPE-001 + NaIO <sub>3</sub> + Bafilomycin A1 | >0.9999 |
| <b>Figure 5B</b>                   |                                              |         |
| Vehicle                            | MPE-001                                      | 0.8481  |
| Vehicle                            | NaIO <sub>3</sub>                            | 0.1137  |
| Vehicle                            | MPE-001+ NaIO <sub>3</sub>                   | <0.0001 |
| NaIO <sub>3</sub>                  | MPE-001+ NaIO <sub>3</sub>                   | 0.0006  |
| <b>Figure 5C</b>                   |                                              |         |
| Vehicle                            | MPE-001                                      | 0.7872  |
| Vehicle                            | NaIO <sub>3</sub>                            | 0.0923  |
| Vehicle                            | MPE-001+ NaIO <sub>3</sub>                   | 0.0045  |
| <b>Figure 6A</b>                   |                                              |         |
| NaIO <sub>3</sub> 0 mM             | NaIO <sub>3</sub> 6.25 mM                    | 0.1925  |
| NaIO <sub>3</sub> 0 mM             | NaIO <sub>3</sub> 12.5 mM                    | 0.0126  |
| NaIO <sub>3</sub> 0 mM             | NaIO <sub>3</sub> 25 mM                      | 0.0045  |
| <b>Figure 6B Left</b>              |                                              |         |
| Vehicle                            | Wortmannin                                   | 0.8714  |
| Vehicle                            | NaIO <sub>3</sub>                            | <0.0001 |
| NaIO <sub>3</sub>                  | MPE-001 + NaIO <sub>3</sub>                  | 0.0458  |
| Wortmannin                         | NaIO <sub>3</sub> + Wortmannin               | <0.0001 |
| NaIO <sub>3</sub> + Wortmannin     | MPE-001 + NaIO <sub>3</sub> + Wortmannin     | 0.9996  |
| <b>Figure 6B Right</b>             |                                              |         |
| Vehicle                            | Bafilomycin A1                               | >0.9999 |
| Vehicle                            | NaIO <sub>3</sub>                            | <0.0001 |
| NaIO <sub>3</sub>                  | MPE-001 + NaIO <sub>3</sub>                  | 0.0095  |
| Bafilomycin A1                     | NaIO <sub>3</sub> + Bafilomycin A1           | 0.0105  |
| NaIO <sub>3</sub> + Bafilomycin A1 | MPE-001 + NaIO <sub>3</sub> + Bafilomycin A1 | 0.9931  |

**Figure 6D**

|                   |                            |         |
|-------------------|----------------------------|---------|
| Vehicle           | MPE-001                    | 0.0050  |
| Vehicle           | NaIO <sub>3</sub>          | 0.4974  |
| Vehicle           | MPE-001+ NaIO <sub>3</sub> | 0.0007  |
| NaIO <sub>3</sub> | MPE-001+ NaIO <sub>3</sub> | <0.0001 |

**Figure S2B**

|                   |                            |        |
|-------------------|----------------------------|--------|
| Vehicle           | MPE-001                    | 0.9999 |
| Vehicle           | NaIO <sub>3</sub>          | 0.0010 |
| NaIO <sub>3</sub> | MPE-001+ NaIO <sub>3</sub> | 0.0361 |

**Figure S3A**

|                   |                        |         |
|-------------------|------------------------|---------|
| Vehicle           | NAC                    | 0.9794  |
| Vehicle           | NaIO <sub>3</sub>      | <0.0001 |
| NaIO <sub>3</sub> | NAC+ NaIO <sub>3</sub> | 0.0374  |

**Figure S3B**

|                                    |                                             |         |
|------------------------------------|---------------------------------------------|---------|
| Vehicle                            | Bafilomycin A1                              | 0.9207  |
| Vehicle                            | NaIO <sub>3</sub>                           | <0.0001 |
| NaIO <sub>3</sub>                  | NAC + NaIO <sub>3</sub>                     | 0.0369  |
| Bafilomycin A1                     | NaIO <sub>3</sub> + Bafilomycin A1          | <0.0001 |
| NaIO <sub>3</sub> + Bafilomycin A1 | NAC + NaIO <sub>3</sub> +<br>Bafilomycin A1 | 0.0387  |

**Figure S4**

|                                    |                                                 |         |
|------------------------------------|-------------------------------------------------|---------|
| Vehicle                            | Bafilomycin A1                                  | 0.9989  |
| Vehicle                            | NaIO <sub>3</sub>                               | <0.0001 |
| NaIO <sub>3</sub>                  | MPE-001 + NaIO <sub>3</sub>                     | 0.0423  |
| Bafilomycin A1                     | NaIO <sub>3</sub> + Bafilomycin A1              | <0.0001 |
| NaIO <sub>3</sub> + Bafilomycin A1 | MPE-001 + NaIO <sub>3</sub> +<br>Bafilomycin A1 | 0.9999  |

**Figure S5B**

|                   |                            |        |
|-------------------|----------------------------|--------|
| Vehicle           | MPE-001                    | 0.4804 |
| Vehicle           | NaIO <sub>3</sub>          | 0.0013 |
| Vehicle           | MPE-001+ NaIO <sub>3</sub> | 0.0112 |
| NaIO <sub>3</sub> | MPE-001+ NaIO <sub>3</sub> | 0.7070 |

**Figure S6A**

|                   |                              |        |
|-------------------|------------------------------|--------|
| Vehicle           | NaIO <sub>3</sub>            | 0.0044 |
| NaIO <sub>3</sub> | MitoTEMPO+ NaIO <sub>3</sub> | 0.8997 |

**Figure S6B**

|                   |                              |         |
|-------------------|------------------------------|---------|
| Vehicle           | MitoTEMPO                    | 0.0926  |
| Vehicle           | NaIO <sub>3</sub>            | <0.0001 |
| NaIO <sub>3</sub> | MitoTEMPO+ NaIO <sub>3</sub> | 0.6774  |

**Figure S6C**

|                   |                          |         |
|-------------------|--------------------------|---------|
| Vehicle           | NaIO <sub>3</sub>        | <0.0001 |
| NaIO <sub>3</sub> | MitoQ+ NaIO <sub>3</sub> | 0.0364  |

---

**Figure S6D**

|                   |                          |         |
|-------------------|--------------------------|---------|
| Vehicle           | MitoQ                    | 0.6014  |
| Vehicle           | NaIO <sub>3</sub>        | <0.0001 |
| NaIO <sub>3</sub> | MitoQ+ NaIO <sub>3</sub> | 0.7568  |

---

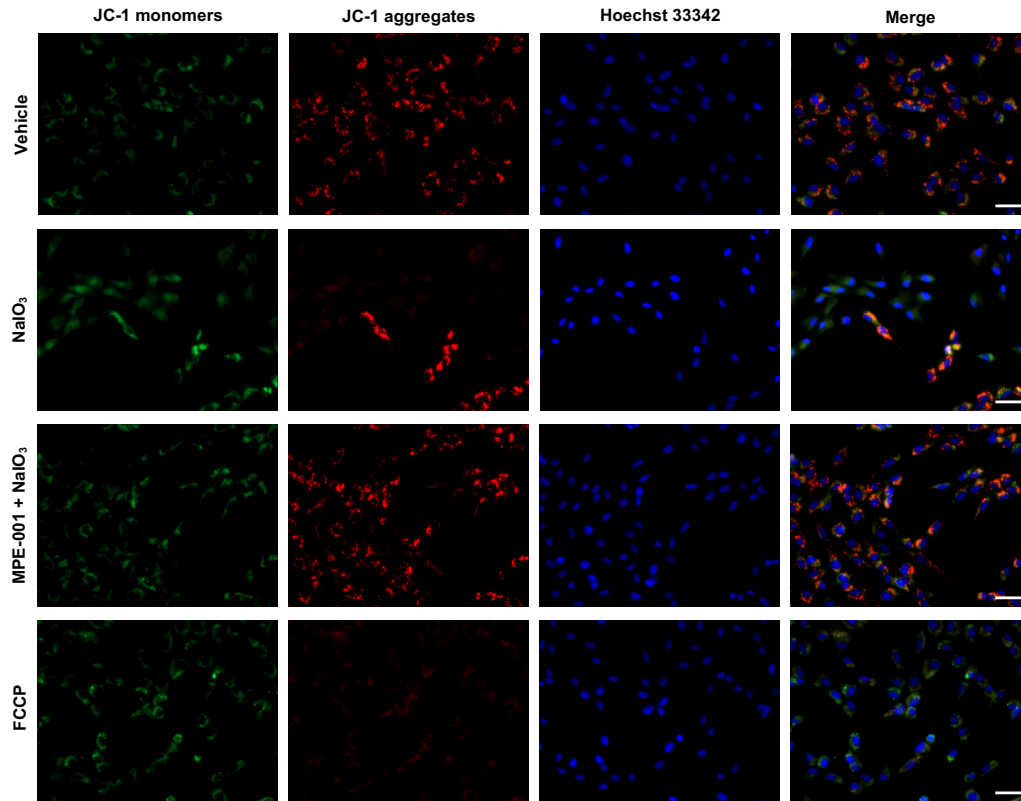

**Figure S1. MPE-001 pretreatment prevents the NaIO<sub>3</sub>-induced loss of mitochondrial membrane potential.** hTERT RPE-1 cells were pretreated with 1  $\mu$ M MPE-001 for 2 h and then exposed to 12.5 mM NaIO<sub>3</sub> for 4 h or were treated with 5  $\mu$ M FCCP for 4 h. Representative images of JC-1 staining are shown (scale bar = 50  $\mu$ m).

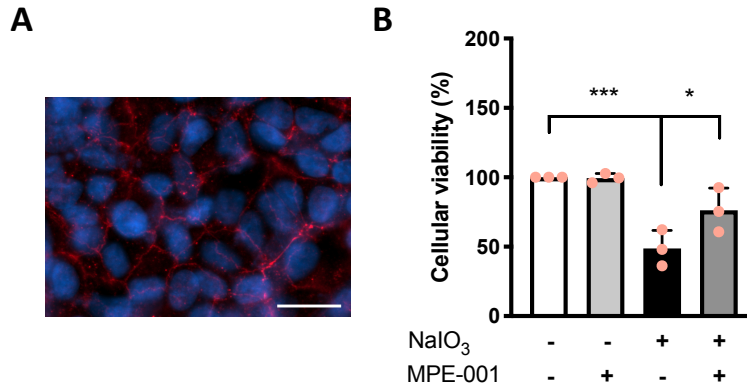

**Figure S2. MPE-001 improved the viability of differentiated ARPE-19 cells exposed to NaIO<sub>3</sub>.** (A) Representative image of ZO-1 (red) and Hoechst 33342 (blue) staining of differentiated ARPE-19 cells grown on Transwell inserts (scale bar = 20  $\mu$ m). (B) Differentiated ARPE-19 cells on Transwell inserts were pretreated with 10 nM MPE-001 through the lower compartment for 2 hours and then exposed to 12.5 mM NaIO<sub>3</sub> for 24 hours. Cellular viability was assessed by CCK-8 (n=3). Mean  $\pm$  SD, \*  $p < 0.05$ , \*\*\*  $p < 0.001$ .

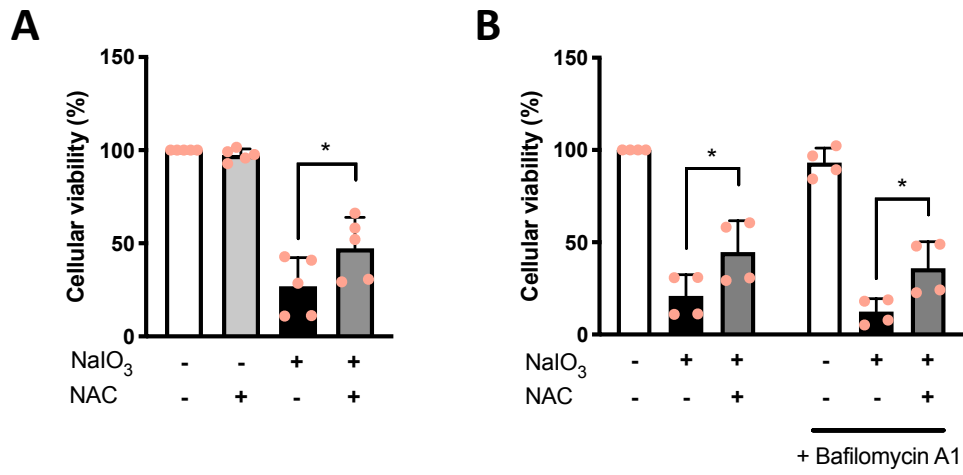

**Figure S3. NAC protected hTERT RPE-1 cells against NaIO<sub>3</sub>-induced cytotoxicity in an autophagy-independent manner.** hTERT RPE-1 cells were co-treated with 1.25 mM NAC and NaIO<sub>3</sub> for 24 hours. (A) Cellular viability assessed by CCK-8 in the absence (n=5) and (B) in the absence/presence of 10 nM bafilomycin A1 (n=4). Mean  $\pm$  SD, ns = non-significant, \*  $p < 0.05$ .

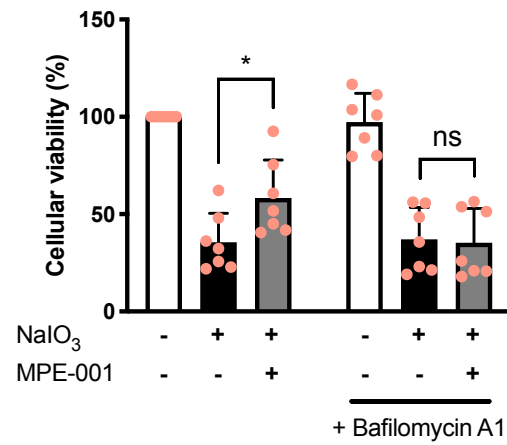

**Figure S4. Bafilomycin A1 abolished the cytoprotective effect of MPE-001 on differentiated ARPE-19 cells.** Differentiated ARPE-19 cells on Transwell inserts were pretreated with 10 nM MPE-001 through the lower compartment for 2 hours and then exposed to 12.5 mM NaIO<sub>3</sub> for 24 hours in the presence/absence of 10 nM bafilomycin A1. Cellular viability was assessed by CCK-8 (n=7), Mean  $\pm$  SD, ns = non-significant, \* p < 0.05.

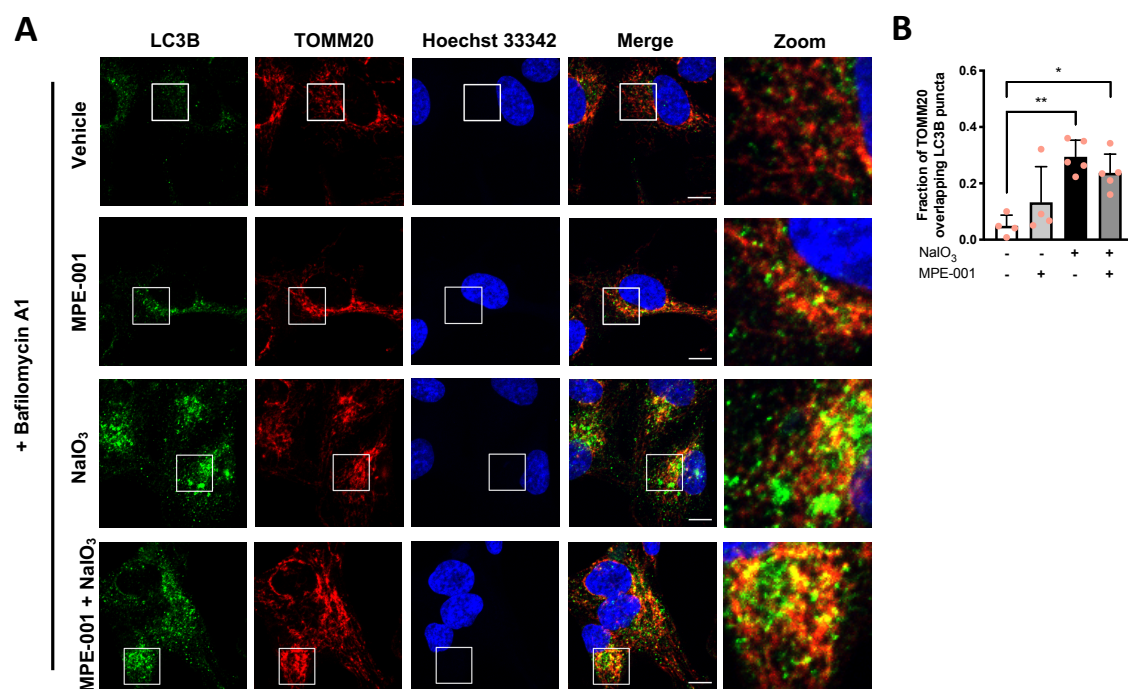

**Figure S5. The effect of MPE-001 and/or NaIO<sub>3</sub> treatments on LC3B and TOMM20 co-localization.** hTERT RPE-1 cells were pretreated with 1  $\mu$ M MPE-001 for 2 h and then exposed to 12.5 mM NaIO<sub>3</sub> for 4 h in the presence of 10 nM bafilomycin A1. (A) Representative images of LC3B and TOMM20 immunostaining are shown (scale bar = 10  $\mu$ m). The same gamma correction was applied to all images. (B) Manders' colocalization coefficient analysis was carried out across series of 4 to 5 images of 4 to 18 cells each. Mean  $\pm$  SD, \*  $p < 0.05$ . \*\*  $p < 0.01$ .

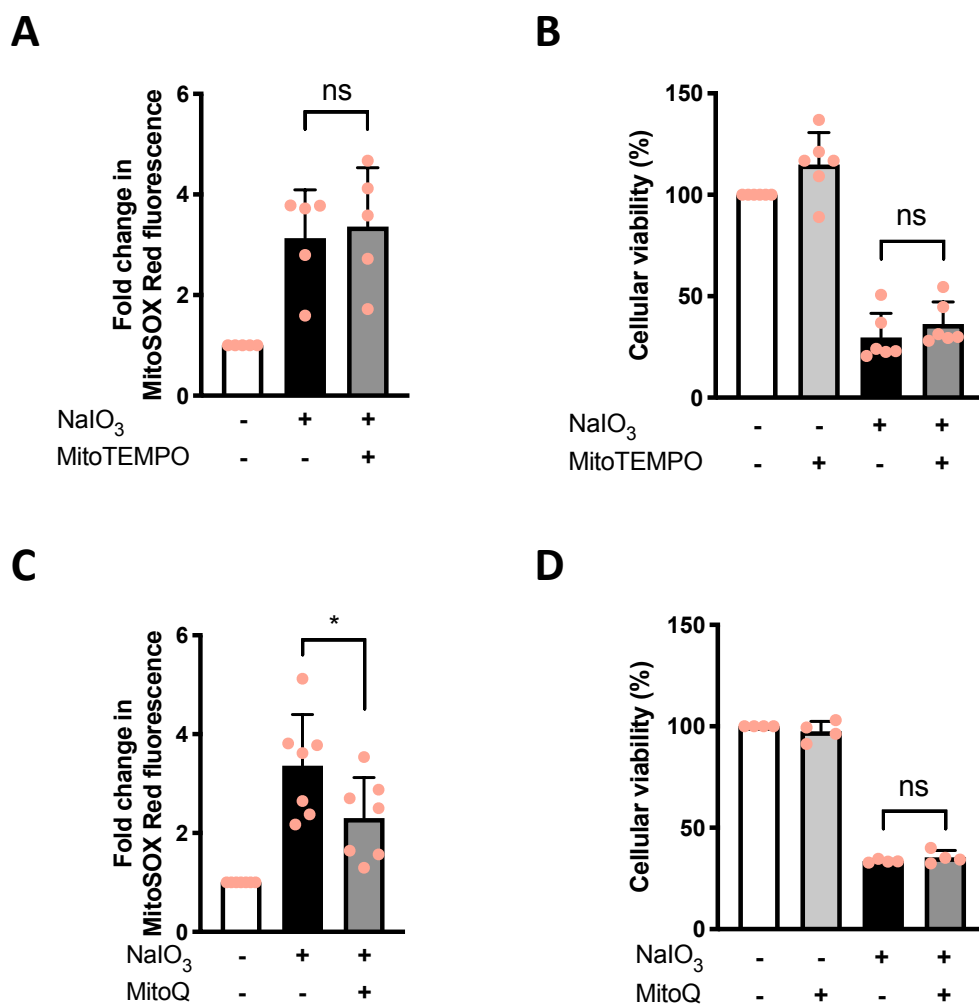

**Figure S6. The effect of mitochondria-selective antioxidant compounds on NaIO<sub>3</sub>-induced cytotoxicity.** (A and B) Cells were pretreated with 20  $\mu$ M MitoTEMPO for 1 hour and then exposed to 12.5 mM NaIO<sub>3</sub>. (A) Mitochondrial superoxide formation after 2 hours of NaIO<sub>3</sub> treatment relative to vehicle-treated cells (n=5) and (B) cellular viability assessed by CCK-8 after 24 hours of NaIO<sub>3</sub> treatment (n=6). (C and D) Cells were pretreated with 5 nM MitoQ for 1 hour and then exposed to 12.5 mM NaIO<sub>3</sub>. (C) Mitochondrial superoxide formation after 2 hours of NaIO<sub>3</sub> treatment relative to vehicle-treated cells (n=7) and (D) cellular viability assessed by CCK-8 after 24 hours of NaIO<sub>3</sub> treatment (n=4). Mean  $\pm$  SD, ns = non-significant, \*  $p < 0.05$ .
